# Supplementary material for: An anticoagulant/hemostatic indwelling needle for oral glucose tolerance test
Source: Royal Society of Chemistry journal article supplement (doi:10.1039/d2bm01133f), 2022-01-01
Supplement: d2bm01133f8.pdf [file d2bm01133f8.pdf]

## Supporting Information

### An Anticoagulant/Hemostatic Indwelling Needle for Oral Glucose

#### Tolerance Test

Xiongfeng Nie, Chunyan Cui, Tengling Wu, Yang Wu, Xinyu Bian, Rong Yang,  
Xiaoping Zhang, Yage Sun, Yang Liu, and Wenguang Liu \*

School of Material Science and Engineering, Tianjin Key Laboratory of Composite  
and Functional Materials, Tianjin University, Tianjin 300350, China

\* Corresponding author (E-mail: [wgliu@tju.edu.cn](mailto:wgliu@tju.edu.cn))

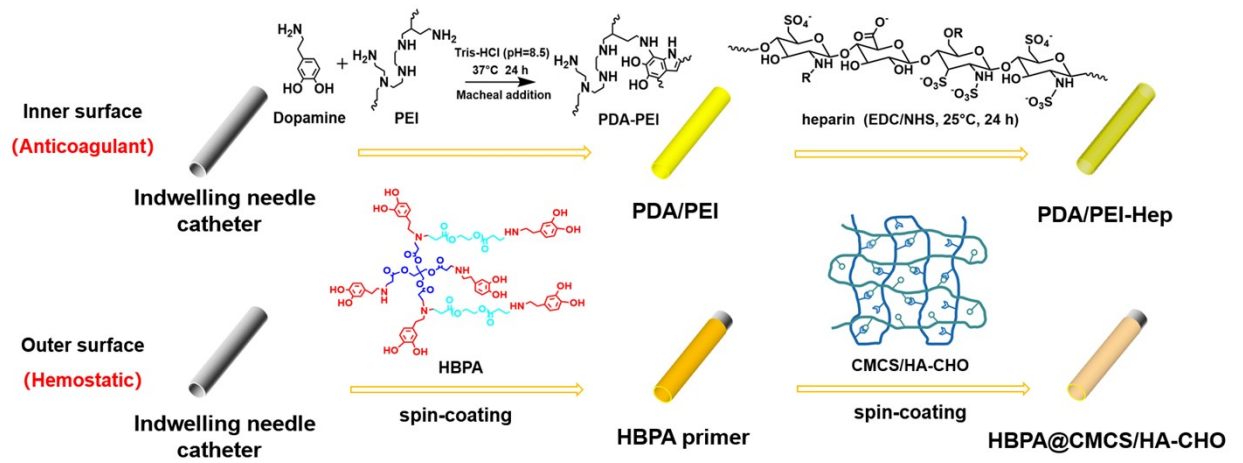

**Fig. S1** Illustration of the preparation process of PDA/PEI-Hep & HBPA@CMCS/HA-CHO-coated indwelling needle.

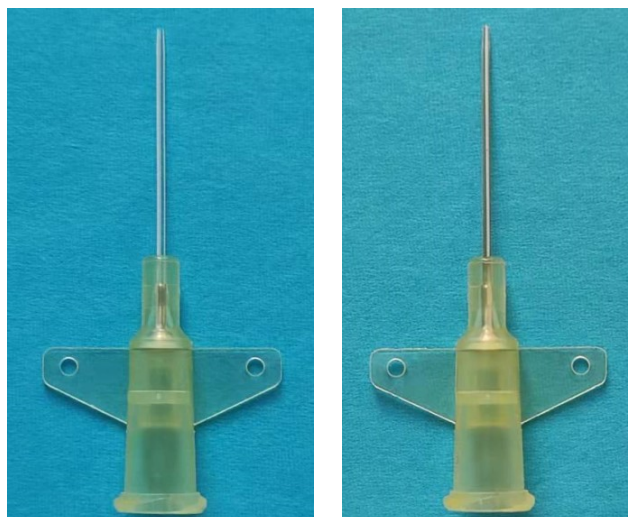

**Fig. S2** Digital photos of bare indwelling needles (left) and PDA/PEI-coated indwelling needles (right).

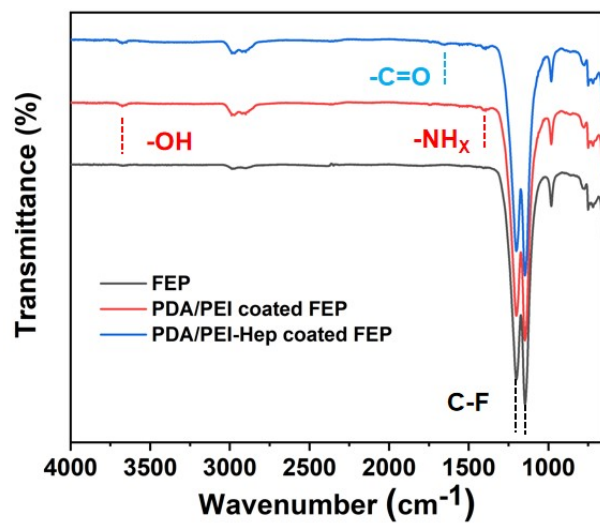

**Fig. S3** ATR-FTIR spectra of FEP, PDA/PEI-coated FEP and PDA/PEI-Hep-coated FEP.

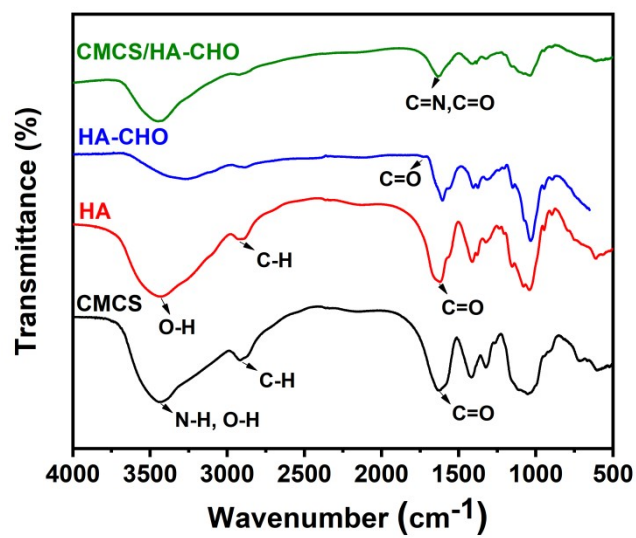

**Fig. S4** FTIR spectra of CMCS, HA, HA-CHO and CMCS/HA-CHO.

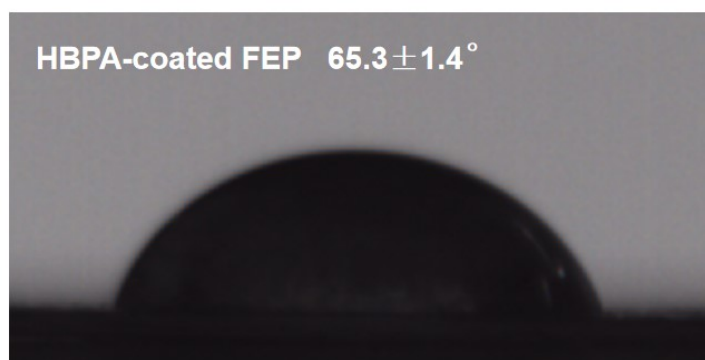

**Fig. S5** Static water contact angle of HBPA-coated FEP.

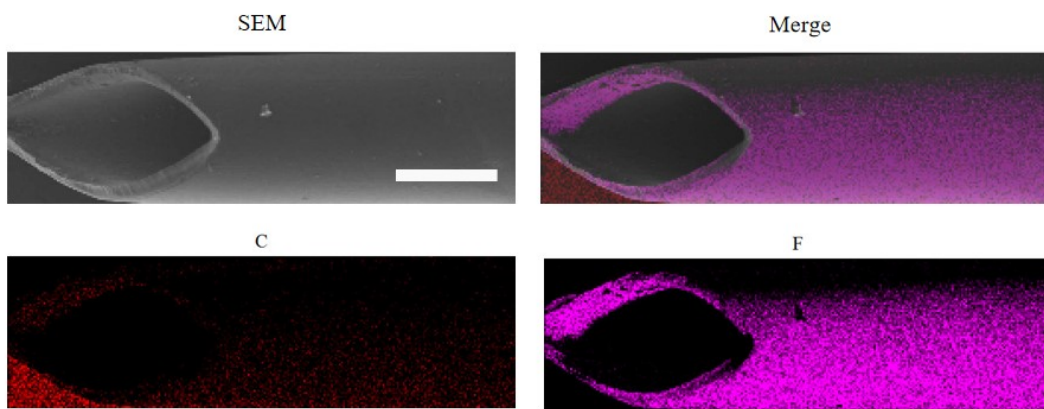

**Fig. S6** SEM images and EDS analysis of bare indwelling needle. Scale bar: 500  $\mu\text{m}$ .

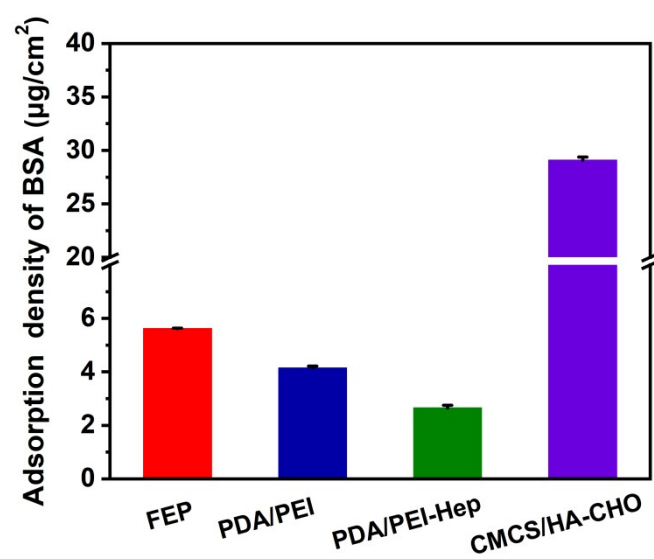

**Fig. S7** Adsorption density of BSA on FEP, PDA/PEI-coated FEP, PDA/PEI-Hep-coated FEP and CMCS/HA-CHO by quantitative measurement with Micro BCA Protein Quantitation Kit.





**Mov. S1** Bare indwelling needle was implanted into the rabbit ear vein and clotted after 30 min.

**Mov. S2** PDA/PEI-Hep & HBPA@CMCS/HA-CHO-coated indwelling needle was implanted in the rabbit ear vein and blood could be continuously drawn for 4 times at 0, 1, 2 and 3 h time points.

**Mov. S3** Bleeding was observed when the bare indwelling needle was withdrawn from the rabbit ear vein.

**Mov. S4** Hemostatic effect was shown when the PDA/PEI-Hep & HBPA@CMCS/HA-CHO-coated indwelling needle was withdrawn from the rabbit ear vein after 3 h of implantation.

**Mov. S5** Modified indwelling needle was used to draw blood from the femoral vein of diabetic rats for 4 times at 0, 1, 2, and 3 h time points.

**Mov. S6** Bleeding was observed when the bare indwelling needle was withdrawn from the femoral vein of normal rats.

**Mov. S7** Hemostatic effect was shown when the PDA/PEI-Hep & HBPA@CMCS/HA-CHO-coated indwelling needle was withdrawn from the femoral vein of normal rats after 3 h of implantation.
